# Supplementary material for: Effects of 12 Weeks of Family and Individual Multi-Disciplinary Intervention in Overweight and Obese Adolescents under Cardiometabolic Risk Parameters: A Clinical Trial
Source: MDPI journal article supplement (doi:10.3390/ijerph20206954), 2023-10-20
Supplement: s1 [file s1]

**Supplementary Table S1.** Biochemical, anthropometric, and blood pressure changes per adolescent and classifications before and after the intervention.

| Variables and classification |                | General (male and female) |             |                             |             | Female                 |            |                             |              | Male                    |            |                            |            |
|------------------------------|----------------|---------------------------|-------------|-----------------------------|-------------|------------------------|------------|-----------------------------|--------------|-------------------------|------------|----------------------------|------------|
|                              |                | Family ( <i>n</i> = 21)   |             | Individual ( <i>n</i> = 22) |             | Family ( <i>n</i> = 9) |            | Individual ( <i>n</i> = 14) |              | Family ( <i>n</i> = 12) |            | Individual ( <i>n</i> = 8) |            |
| Biochemical                  | Classification | Pre                       | Post        | Pre                         | Post        | Pre                    | Post       | Pre                         | Post         | Pre                     | Post       | Pre                        | Post       |
| Fasting glucose              | Non-diabetics  | 10 (47.61%)               | 15 (71.43%) | 10 (45.45%)                 | 17 (77.27%) | 5 (55.55%)             | 7 (77.77%) | 9 (64.28%)                  | 14 (100.00%) | 5 (41.66%)              | 8 (66.66%) | 1 (12.50%)                 | 3 (37.50%) |
|                              | Pre-diabetic   | 11 (52.38%)               | 6 (28.57%)  | 12 (54.54%)                 | 5 (22.72%)  | 4 (44.44%)             | 2 (22.22%) | 5 (35.71%)                  | 0 (0%)       | 7 (58.33%)              | 4 (33.33%) | 7 (87.50%)                 | 5 (62.50%) |
| TG                           | Normal pattern | 1 (4.76%)                 | 12 (57.14%) | 1 (4.54%)                   | 10 (45.45%) | 1 (11.11%)             | 5 (55.55%) | 0 (0%)                      | 6 (42.85%)   | 0 (0%)                  | 7 (58.33%) | 1 (12.50%)                 | 4 (50.00%) |
|                              | Borderline     | 20 (95.23%)               | 9 (42.85%)  | 21 (95.45%)                 | 12 (54.54%) | 8 (88.88%)             | 4 (44.44%) | 14 (100.00%)                | 8 (57.14%)   | 12 (100.00%)            | 5 (41.66%) | 7 (87.50%)                 | 4 (50.00%) |
| TC                           | Normal pattern | 12 (57.14%)               | 16 (76.19%) | 14 (63.63%)                 | 17 (77.27%) | 6 (66.66%)             | 7 (77.77%) | 8 (57.14%)                  | 10 (71.42%)  | 6 (50.00%)              | 9 (75.00%) | 6 (75.00%)                 | 7 (87.50%) |
|                              | Borderline     | 5 (23.80%)                | 3 (14.28%)  | 4 (18.18%)                  | 2 (9.09%)   | 2 (22.22%)             | 2 (22.22%) | 3 (21.42%)                  | 2 (14.28%)   | 3 (25.00%)              | 1 (8.33%)  | 1 (12.50%)                 | 0 (0%)     |
|                              | Higher values  | 4 (19.04%)                | 2 (9.52%)   | 4 (18.18%)                  | 3 (13.63%)  | 1 (11.11%)             | 0 (0%)     | 3 (21.42%)                  | 2 (14.28%)   | 3 (25.00%)              | 2 (16.66%) | 1 (12.50%)                 | 1 (12.50%) |
| HDL-c                        | Normal pattern | 1 (4.76%)                 | 12 (57.14%) | 1 (4.54%)                   | 10 (45.45%) | 1 (11.11%)             | 5 (55.55%) | 0 (0%)                      | 6 (42.85%)   | 0 (0%)                  | 7 (58.33%) | 1 (12.50%)                 | 4 (50.00%) |
|                              | Below normal   | 20 (95.23%)               | 9 (42.85%)  | 21 (95.45%)                 | 12 (54.54%) | 8 (88.88%)             | 4 (44.44%) | 14 (100.00%)                | 8 (57.14%)   | 12 (100.00%)            | 5 (41.66%) | 7 (87.50%)                 | 4 (50.00%) |
| LDL-c                        | Normal pattern | 4 (19.04%)                | 13 (61.90%) | 8 (36.36%)                  | 16 (72.72%) | 1 (11.11%)             | 4 (44.44%) | 3 (21.42%)                  | 10 (71.42%)  | 3 (25.00%)              | 9 (75.00%) | 5 (62.50%)                 | 6 (75.00%) |
|                              | Borderline     | 5 (23.80%)                | 5 (23.80%)  | 6 (27.27%)                  | 5 (22.72%)  | 2 (22.22%)             | 3 (33.33%) | 3 (21.42%)                  | 4 (28.57%)   | 3 (25.00%)              | 2 (16.66%) | 3 (37.50%)                 | 1 (12.50%) |
|                              | Higher values  | 12 (57.14%)               | 3 (14.28%)  | 8 (36.36%)                  | 1 (4.54%)   | 6 (66.66%)             | 2 (22.22%) | 8 (57.14%)                  | 0 (0%)       | 6 (50.00%)              | 1 (8.33%)  | 0 (0%)                     | 1 (12.50%) |
| BMI                          | Overweight     | 10 (47.63%)               | 12 (57.15%) | 11 (50.01%)                 | 13 (59.10%) | 6 (66.66%)             | 7 (77.77%) | 4 (36.36%)                  | 5 (41.66%)   | 4 (8.33%)               | 5 (41.66%) | 6 (75.00%)                 | 7 (87.5%)  |
|                              | Obesity        | 8 (38.09%)                | 7 (33.33%)  | 3 (13.63%)                  | 4 (18.18%)  | 3 (33.33%)             | 2 (22.22%) | 5 (45.45%)                  | 5 (41.66%)   | 5 (41.66%)              | 5 (41.66%) | 1 (12.50%)                 | 0 (0%)     |
|                              | Severe Obesity | 3 (14.28%)                | 2 (9.52%)   | 8 (36.36%)                  | 5 (22.72%)  | 0 (0%)                 | 0 (0%)     | 3 (27.27%)                  | 2 (16.68%)   | 3 (25.00%)              | 2 (16.66%) | 1 (12.50%)                 | 1 (12.50%) |
| SBP                          | Normal pattern | 12 (57.14%)               | 16 (76.19%) | 14 (63.63%)                 | 17 (77.27%) | 6 (66.66%)             | 7 (77.77%) | 8 (57.14%)                  | 10 (71.42%)  | 6 (50.00%)              | 9 (75.00%) | 6 (75.00%)                 | 7 (87.50%) |
|                              | High values    | 5 (23.80%)                | 3 (14.28%)  | 4 (18.18%)                  | 2 (9.09%)   | 2 (22.22%)             | 2 (22.22%) | 3 (21.42%)                  | 2 (14.28%)   | 3 (25.00%)              | 1 (8.33%)  | 1 (12.50%)                 | 0 (0%)     |
|                              | Hypertension   | 4 (19.04%)                | 2 (9.52%)   | 4 (18.18%)                  | 3 (13.63%)  | 1 (11.11%)             | 0 (0%)     | 3 (21.42%)                  | 2 (14.28%)   | 3 (25.00%)              | 2 (16.66%) | 1 (12.50%)                 | 1 (12.50%) |
| DPB                          | Normal pattern | 10 (47.61%)               | 15 (71.43%) | 10 (45.45%)                 | 17 (77.27%) | 5 (55.55%)             | 7 (77.77%) | 9 (64.28%)                  | 14 (100.00%) | 5 (41.66%)              | 8 (66.66%) | 1 (12.50%)                 | 3 (37.50%) |
|                              | High values    | 11 (52.38%)               | 6 (28.57%)  | 12 (54.54%)                 | 5 (22.72%)  | 4 (44.44%)             | 2 (22.22%) | 5 (35.71%)                  | 0 (0%)       | 7 (58.33%)              | 4 (33.33%) | 7 (87.50%)                 | 5 (62.50%) |
|                              | Hypertension   | 0 (0%)                    | 0 (0%)      | 0 (0%)                      | 0 (0%)      | 0 (0%)                 | 0 (0%)     | 0 (0%)                      | 0 (0%)       | 0 (0%)                  | 0 (0%)     | 0 (0%)                     | 0 (0%)     |

**Note:** Data are expressed as absolute and relative (%) values.; TG = triglycerides (mg/dL); TC = total cholesterol (mg/dL); HDL-c = high-density lipoprotein (mg/dL); LDL-c = low-density lipoprotein (mg/dL); BMI = body mass index (kg/m<sup>2</sup>); SBP = systolic blood pressure (mmHg) and DBP = diastolic blood pressure (mmHg).
